# Supplementary material for: Characterization of a Diffusible Signaling Factor from Xylella fastidiosa
Source: PubMed Central journal article supplement — mBio. 2013 Jan 8;4(1):e00539-12. doi: 10.1128/mBio.00539-12 (PMC3546559; doi:10.1128/mbio.00539-12), 2013-01-08
Supplement: mbo006121410st1.pdf [file mbo006121410st1.pdf]

**Table S1:** Strains, plasmids and primers used in this study

| <b>Strain</b>                                  | <b>Description</b>                                                               | <b>Reference</b> |
|------------------------------------------------|----------------------------------------------------------------------------------|------------------|
| <i>Xylella fastidiosa</i><br><i>Temecula 1</i> | Wild type strain                                                                 | ATCC700964       |
| KLN61                                          | <i>X. fastidiosa</i> <i>Temecula1</i> <i>rpfF::kanR</i>                          | 4                |
| SC8                                            | <i>X. fastidiosa</i> <i>Temecula1</i> <i>rpfC::kanR</i>                          | 13               |
| MIX1                                           | <i>X. fastidiosa</i> <i>Temecula1</i> $\Delta$ <i>phoA</i> ( <i>kanR</i> )       | This study       |
| XfHA                                           | MIX1 pXfHA ( <i>hxfA'</i> :: <i>phoA</i> )                                       | This study       |
| XfHB                                           | MIX1 pXfHB ( <i>hxfB'</i> :: <i>phoA</i> )                                       | This study       |
| XfR                                            | MIX1 pXfR ( <i>rrsH'</i> :: <i>phoA</i> )                                        | This study       |
| XfPL                                           | MIX1 pXfPL (promoterless <i>phoA</i> )                                           | This study       |
| <i>Xanthomonas campestris</i><br>8523          | <i>rpfF::kanR</i>                                                                | 3                |
| <i>Escherichia coli</i> DH5 $\alpha$           |                                                                                  | Invitrogen       |
| <i>Erwinia herbicola</i><br>299R               |                                                                                  | 33               |
| <b>Plasmid</b>                                 | <b>Description</b>                                                               | <b>Reference</b> |
| pUC19                                          | Cloning vector, <i>ampR</i> ( <i>bla</i> )                                       | Invitrogen       |
| pBBR1MCS-2                                     | <i>kanR</i> gene ( <i>aph(3')</i> II)                                            | 25               |
| pBBR1MCS-5                                     | <i>gentR</i> gene ( <i>aaaC1</i> )                                               | 25               |
| pFXFkan                                        | pUC19 <i>kanR</i> gene from pBBR1MCS-2                                           | This study       |
| pFXFphoA                                       | pFXFkan <i>gltT'</i> - <i>kanR</i> - <i>mesJ'</i> ( <i>phoA</i> knockout vector) | This study       |
| pXfPL                                          | pBBR1MCS-5 <i>X. fastidiosa</i> <i>phoA</i>                                      | This study       |

|                                   |                                                            |                                         |
|-----------------------------------|------------------------------------------------------------|-----------------------------------------|
| pXf/HA                            | pXf/PL <i>hxfA'</i> :: <i>phoA</i>                         | This study                              |
| pXf/HB                            | pXf/PL <i>hxfB'</i> :: <i>phoA</i>                         | This study                              |
| pXf/R                             | pXf/PL <i>rrsH'</i> :: <i>phoA</i>                         | This study                              |
| pVSP61                            | pVS1 and pACY184 Ori, <i>kanR</i>                          | 32                                      |
| pKLN55                            | pVSP61 <i>Xcc engXCA'</i> :: <i>gfp</i>                    | 4                                       |
| pVSP61- <i>rpjF</i>               | pVSP61 <i>kanR'</i> :: <i>rpjF</i>                         | This study                              |
| <b>Primer name</b>                | <b>Sequence (5' → 3')</b>                                  | <b>Description</b>                      |
| <b>Cloning primers</b>            |                                                            |                                         |
| <i>rpjF</i> -F/HindIII            | GCAAGCTTAGGAGGACAGCTATGTCCGCTGTACATCCCATTCC                | Construction of<br>pVSP61- <i>rpjF</i>  |
| <i>rpjF</i> -R/EcoRI              | GCGAATTCTCAGTTTTTTAGTGCTGTGTTTTTGTGAGTCTG                  |                                         |
| <i>kan</i> Promoter-<br>F/EcoRI   | GCGAATTCTGTCTCTTATACACATC                                  |                                         |
| <i>kan</i> Promoter-<br>R/HindIII | GCAAGCTTAACACCC CTTGTATTAC                                 |                                         |
| <i>kan</i> -F/BamHI               | TTGTAGTAGGATCCTGTGTGAAATTGTTATCCG                          | Construction of                         |
| <i>kan</i> -R/BamHI               | TTGTCGTTGGATCCAAGCCCAAGAGACGGCCCGAG                        | pFXF <i>kan</i>                         |
| <i>pho</i> AGENOM<br>E-F          | TCTGCTGCCACTTCTACTACCCAG                                   | Verifying <i>phoA</i><br>deletion       |
| <i>pho</i> AGENOM<br>E-R          | GTGGCAACTTGATCGGCACG                                       |                                         |
| <i>glt</i> -F/EcoRI               | TTGTAGTAGAATTCCCTGGCGCGACACCCCTG                           | Construction of<br>pFXF <i>phoA</i>     |
| <i>glt</i> -R/KpnI                | TTGTAGTAGGTACCGCTATGGCAAATGACACGAC                         |                                         |
| <i>mesJ</i> -F/XbaI               | TTGTAGTATCTAGACCAGAGCAGGGAGTGAACCAC                        |                                         |
| <i>mesJ</i> -<br>R/HindIII        | TTGTAGTAAAGCTTCAATCCAATCCAGGTGCTGC                         |                                         |
| Xf/PL-F/SacI                      | TTTACCTTGAGCTCAAAGGAAGGAATGGTCATGTTCCGACGTTT<br>TTCTACTTTC | Construction of<br>pXf/PL (promoterless |

|                               |                                              |                                                                     |
|-------------------------------|----------------------------------------------|---------------------------------------------------------------------|
| <i>Xj</i> PL-R/ <i>Xba</i> I  | TTTACCTTTCTAGATTCGCTGTGCTCGTGGACATCAG        | <i>phoA</i> )                                                       |
| <i>Ec</i> LAC-F/ <i>Sac</i> I | ATATACGCGAGCTCCCACTGCGATGCTGGTTGCC           | Construction of<br><i>pEc</i> LAC<br>( <i>lacZ</i> :: <i>phoA</i> ) |
| <i>Ec</i> LAC-R/ <i>Sac</i> I | ATATACGCGAGCTCGGGATGTGCTGCAAGGCGATTAAG       |                                                                     |
| <i>Xj</i> HA-F/ <i>Sac</i> I  | ATATAGTCGAGCTCGTTTGGCTTATAAAGCACTGG          | Construction of<br><i>pXj</i> HA<br>( <i>hxfA</i> :: <i>phoA</i> )  |
| <i>Xj</i> HA-R/ <i>Sac</i> I  | ATATAGTCGAGCTCTTAGGGATGGAGGCAGGCACG          |                                                                     |
| <i>Xj</i> HB-F/ <i>Sac</i> I  | ATATAGTCGAGCTCCATCCATACACGTGCAACCTG          | Construction of<br><i>pXj</i> HB<br>( <i>hxfB</i> :: <i>phoA</i> )  |
| <i>Xj</i> HB-R/ <i>Sac</i> I  | ATATAGTCGAGCTCTTAATCTGAGGTACCGCCGGGTGC       |                                                                     |
| <i>Xj</i> R-F/ <i>Sac</i> I   | ATATAGTCGAGCTCTGGTTGGCAAGCGGTGGTGAC          | Construction of <i>pXj</i> R<br>( <i>rrsH</i> :: <i>phoA</i> )      |
| <i>Xj</i> R-R/ <i>Sac</i> I   | ATATAGTCGAGCTCCTGCCGCCAGCGTTCCTC             |                                                                     |
| <b>qPCR primers</b>           |                                              |                                                                     |
| <i>rpoD</i>                   | GGCTTGAGCGAGGTACAAG<br>CGTCAACCTCAACAATGGAC  | Endogenous control<br>gene 1                                        |
| <i>rpsO</i>                   | CAGGTTGCACTGTTGACGGC<br>AAAAGACCACGGCGACTATG | Endogenous control<br>gene 2                                        |
| <i>hxfB</i>                   | ACACCCACAGCTCCCACTAC<br>TACCGGCAGCATCTACGTTG |                                                                     |
