# Supplementary material for: Characterization of a Diffusible Signaling Factor from Xylella fastidiosa
Source: PubMed Central journal article supplement — mBio. 2013 Jan 8;4(1):e00539-12. doi: 10.1128/mBio.00539-12 (PMC3546559; doi:10.1128/mbio.00539-12), 2013-01-08
Supplement: mbo006121410st2.pdf [file mbo006121410st2.pdf]

**Table S2:** Preparative HPLC gradient method for DSF isolation and separation of *E* and *Z* isomers of 2-tetradecenoic acid

| Time (min)                                                                                | % MeCN | % H <sub>2</sub> O containing 0.1% TFA |
|-------------------------------------------------------------------------------------------|--------|----------------------------------------|
| Preparative HPLC gradient method for DSF isolation                                        |        |                                        |
| 0                                                                                         | 5      | 95                                     |
| 15                                                                                        | 80     | 20                                     |
| 20                                                                                        | 100    | 0                                      |
| 25                                                                                        | 5      | 95                                     |
| HPLC gradient for the separation of <i>E</i> and <i>Z</i> isomers of 2-tetradecenoic acid |        |                                        |
| 0                                                                                         | 50     | 50                                     |
| 20                                                                                        | 100    | 0                                      |
| 22                                                                                        | 100    | 0                                      |
| 25                                                                                        | 50     | 50                                     |
