# Supplementary figures and images for: Characterization of a Diffusible Signaling Factor from Xylella fastidiosa
Source: PubMed Central journal article supplement — mBio. 2013 Jan 8;4(1):e00539-12. doi: 10.1128/mBio.00539-12 (PMC3546559; doi:10.1128/mbio.00539-12), 2013-01-08

**A**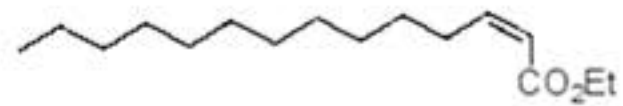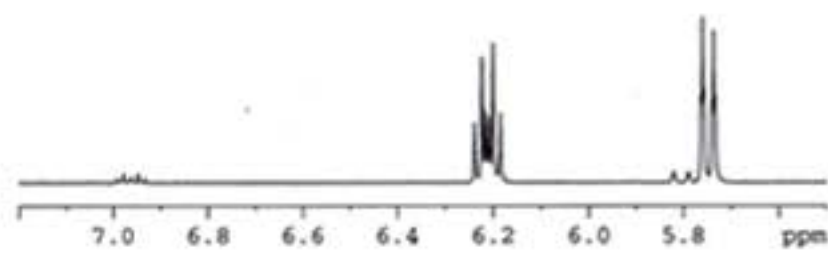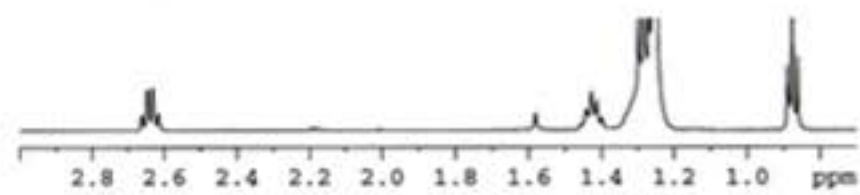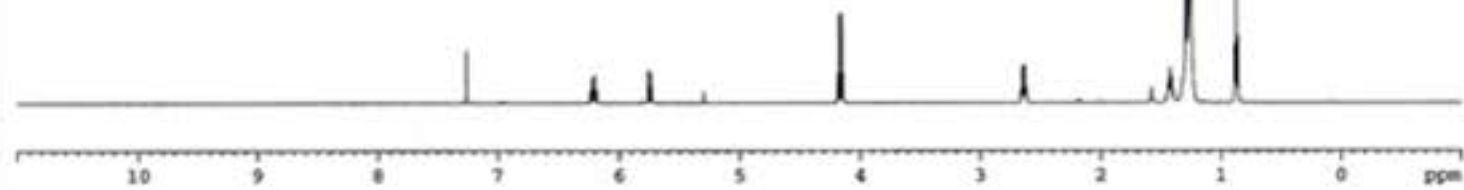**B**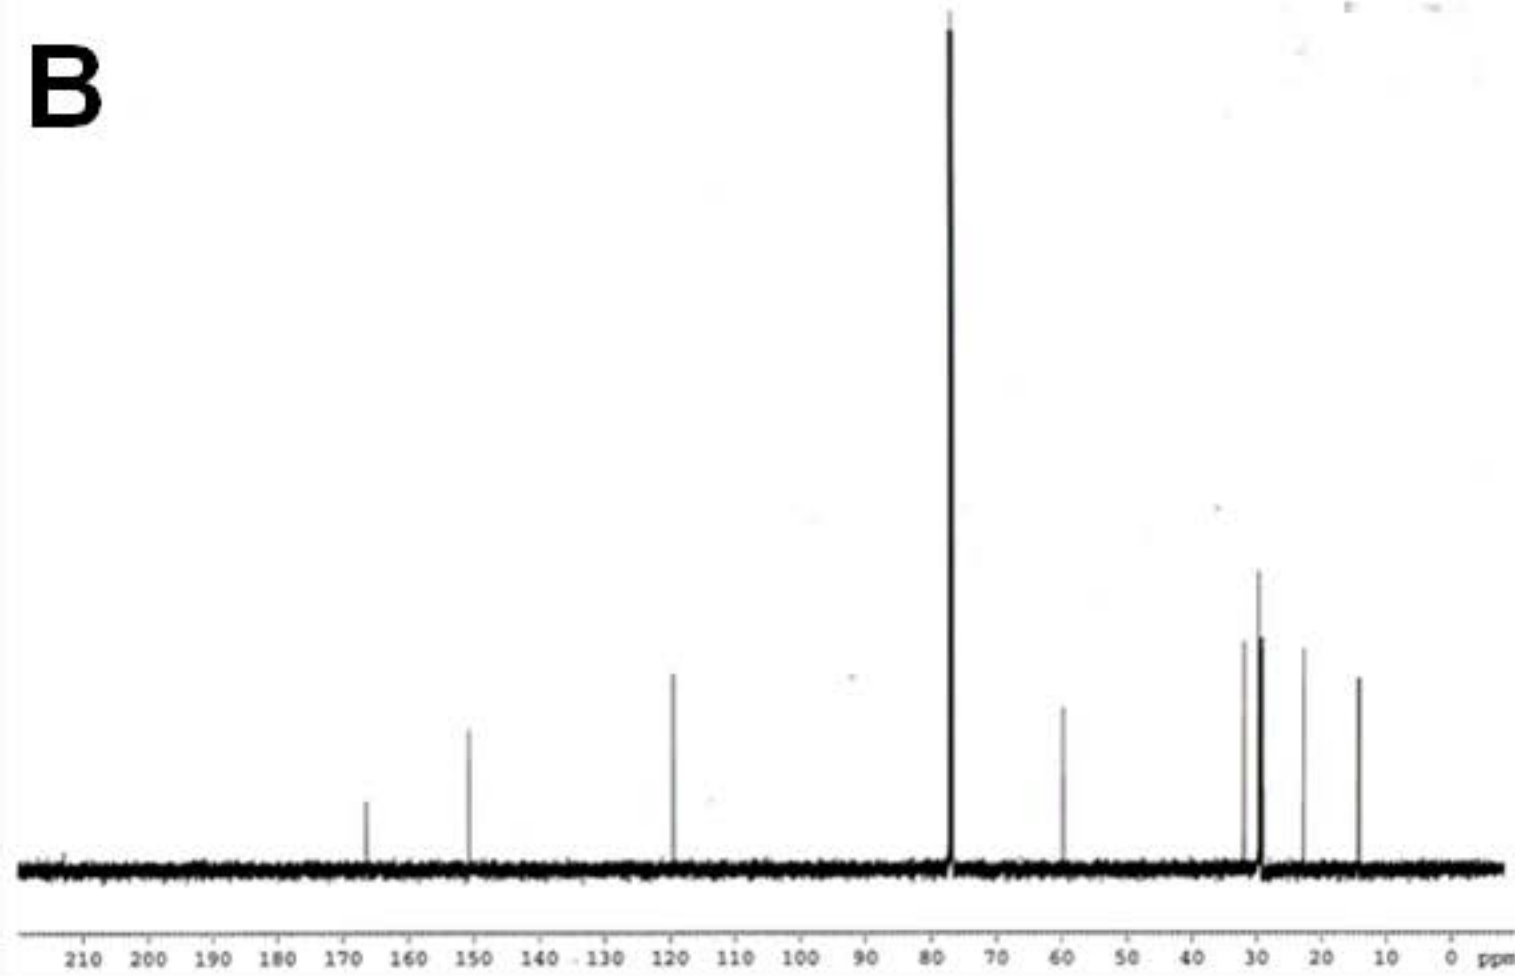**C**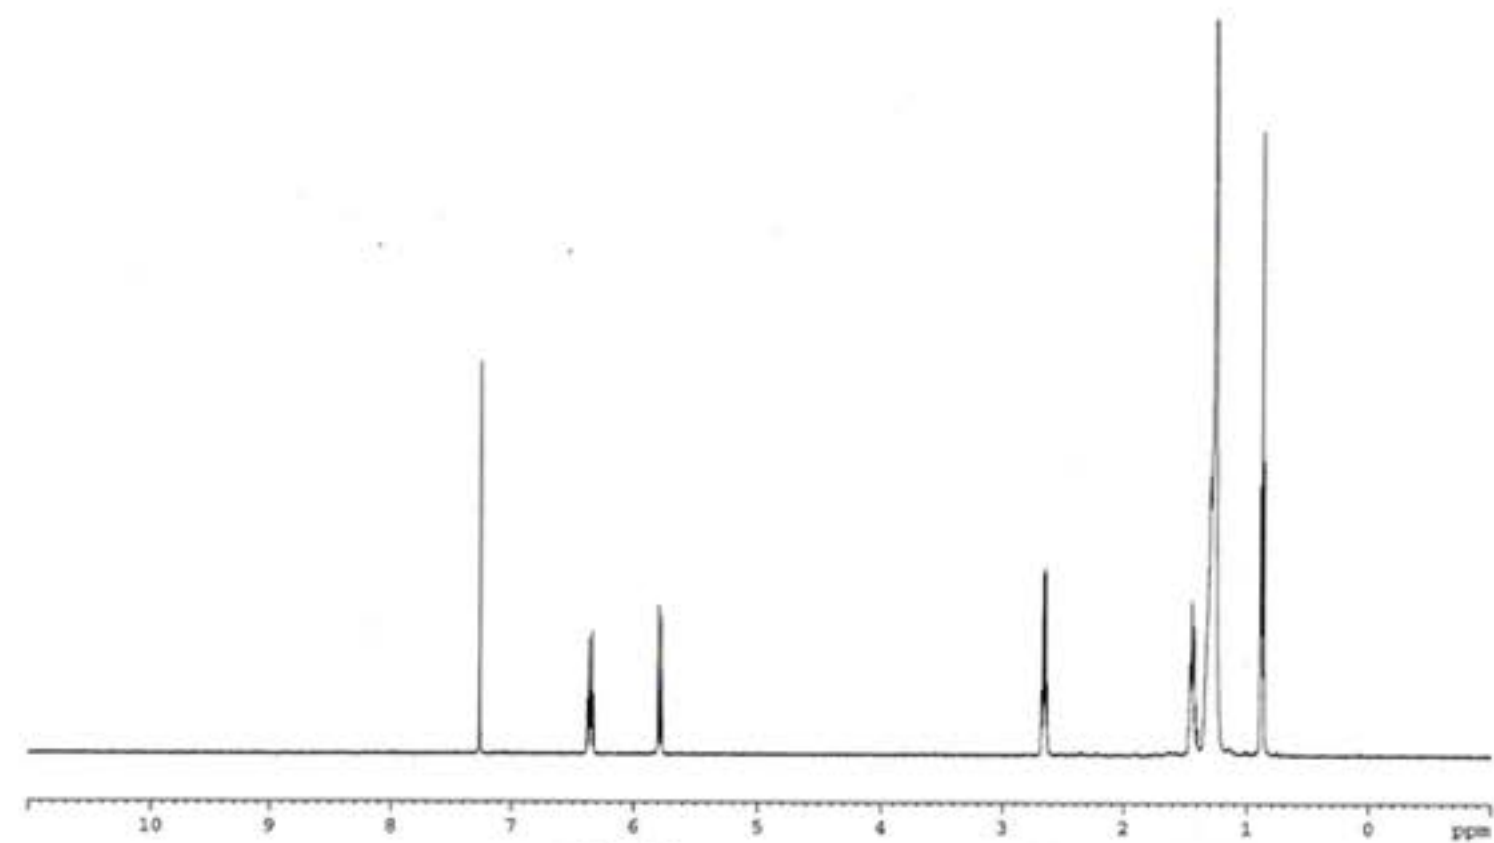**D**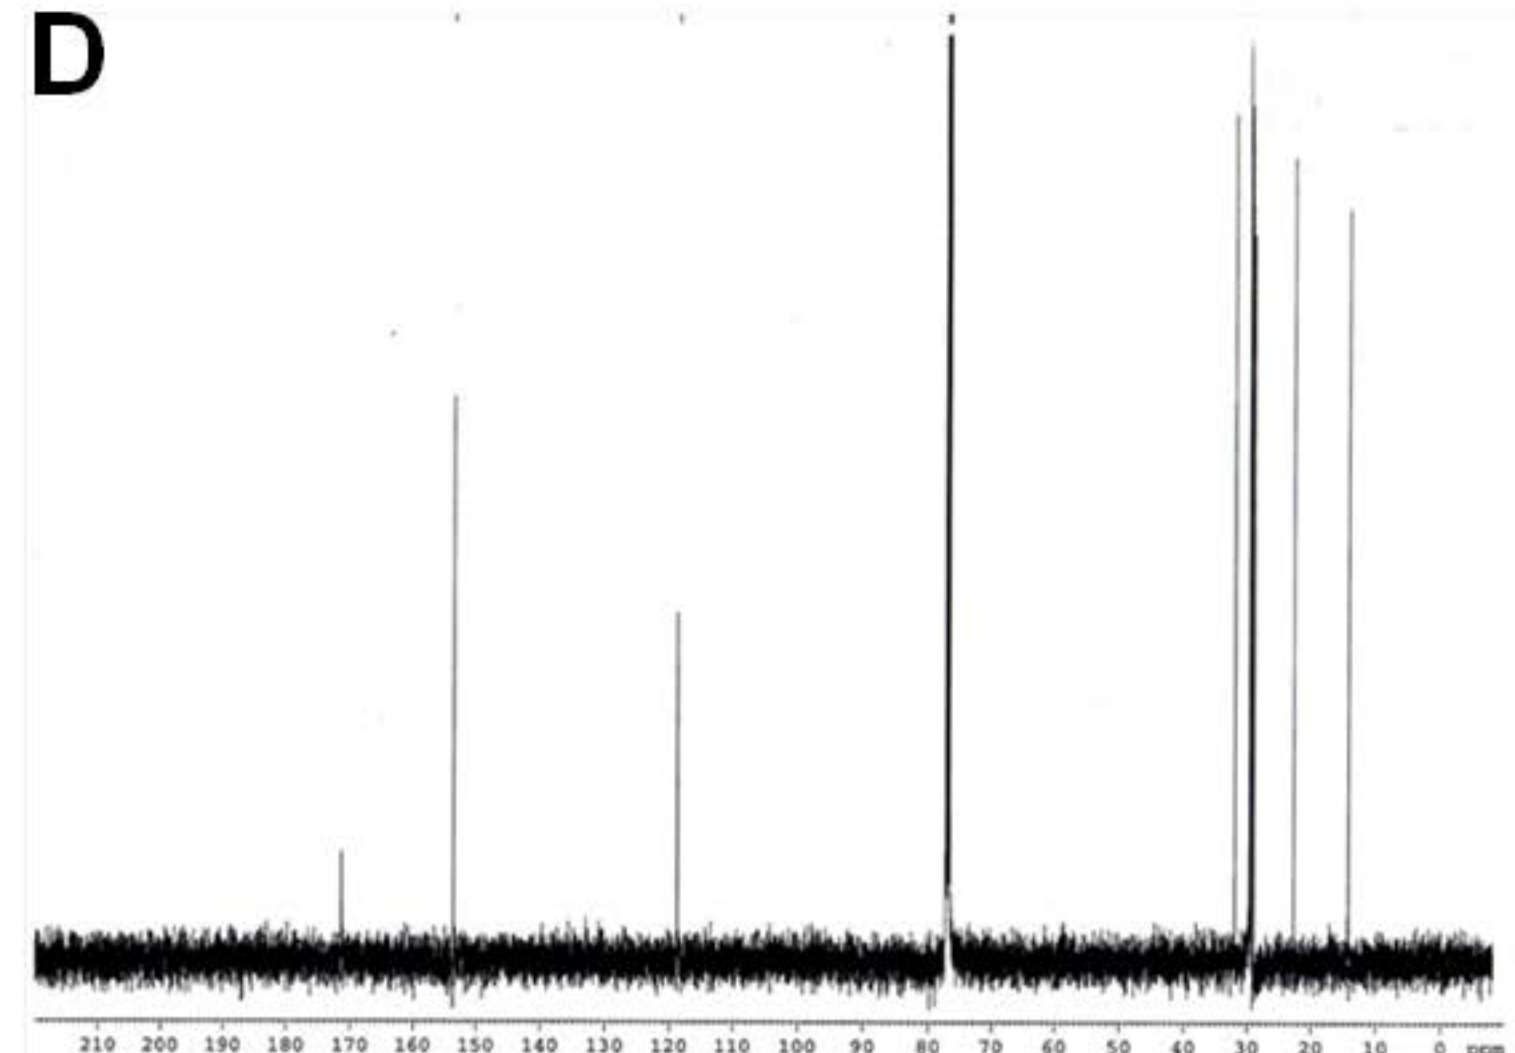

Supplement: mbo006121410sf01.pdf [file mbo006121410sf01.pdf]

**A**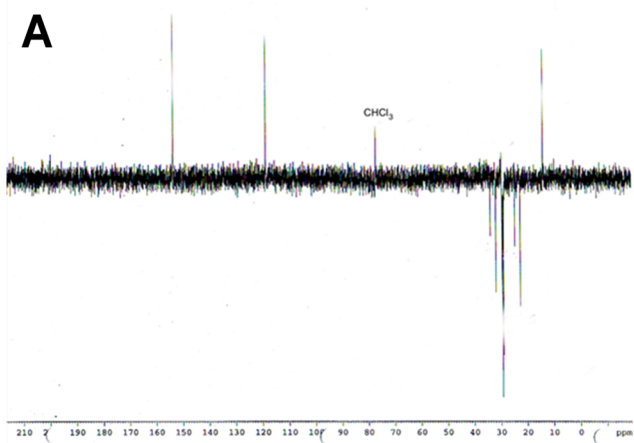**B**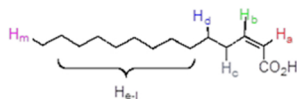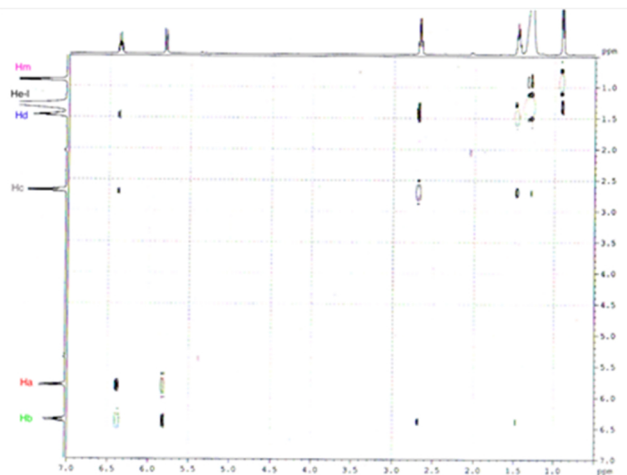**C**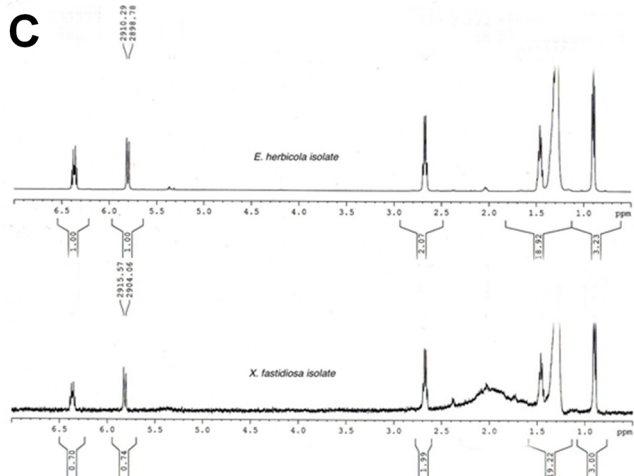**D**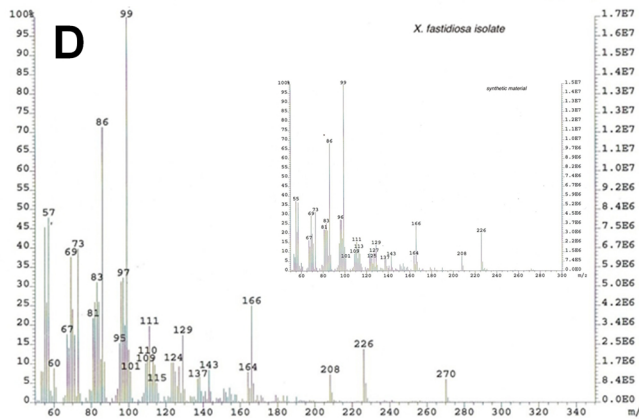

Supplement: mbo006121410sf02.pdf [file mbo006121410sf02.pdf]

**A**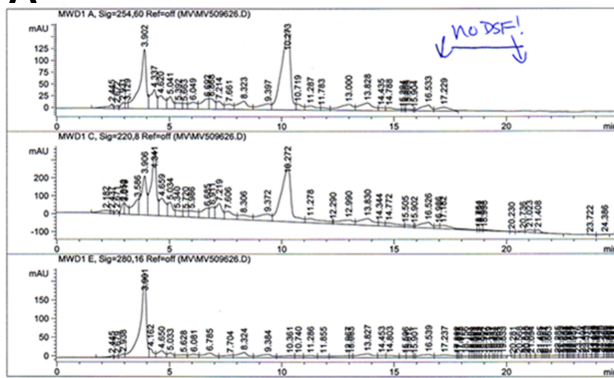**C**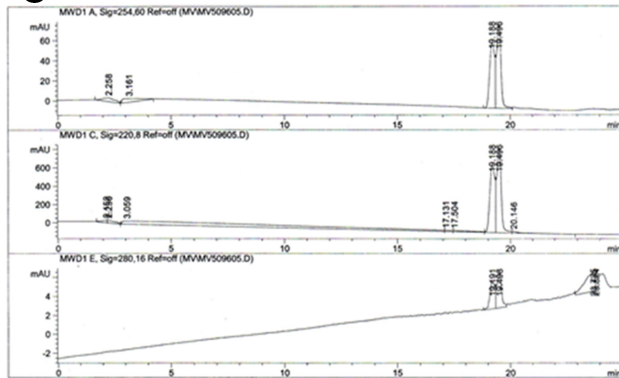**B**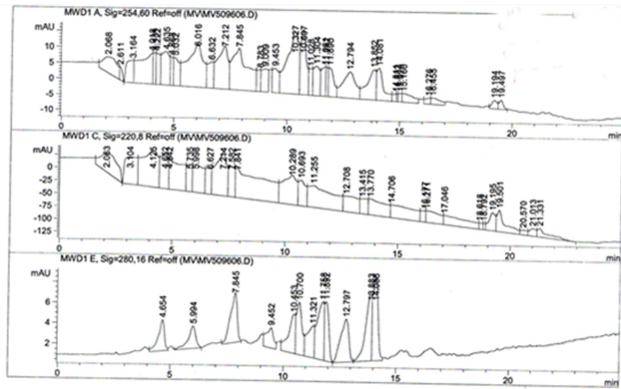

Supplement: mbo006121410sf03.pdf [file mbo006121410sf03.pdf]

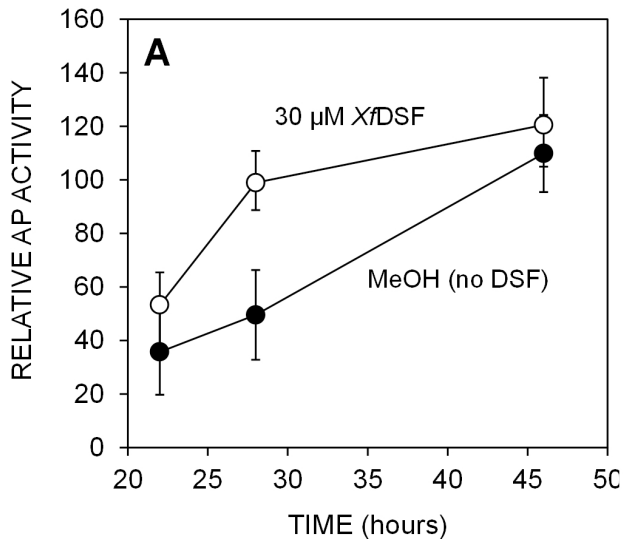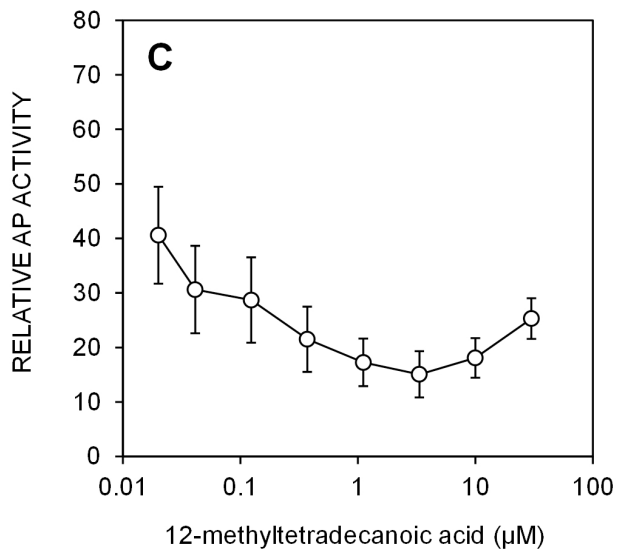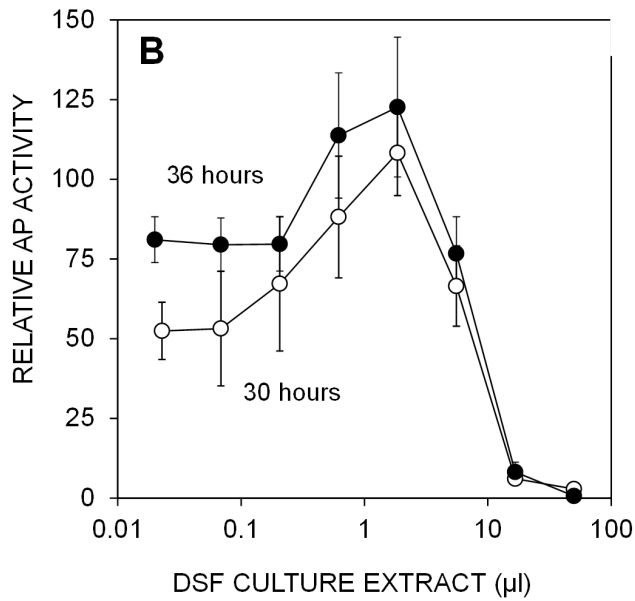

Supplement: mbo006121410sf04.pdf [file mbo006121410sf04.pdf]

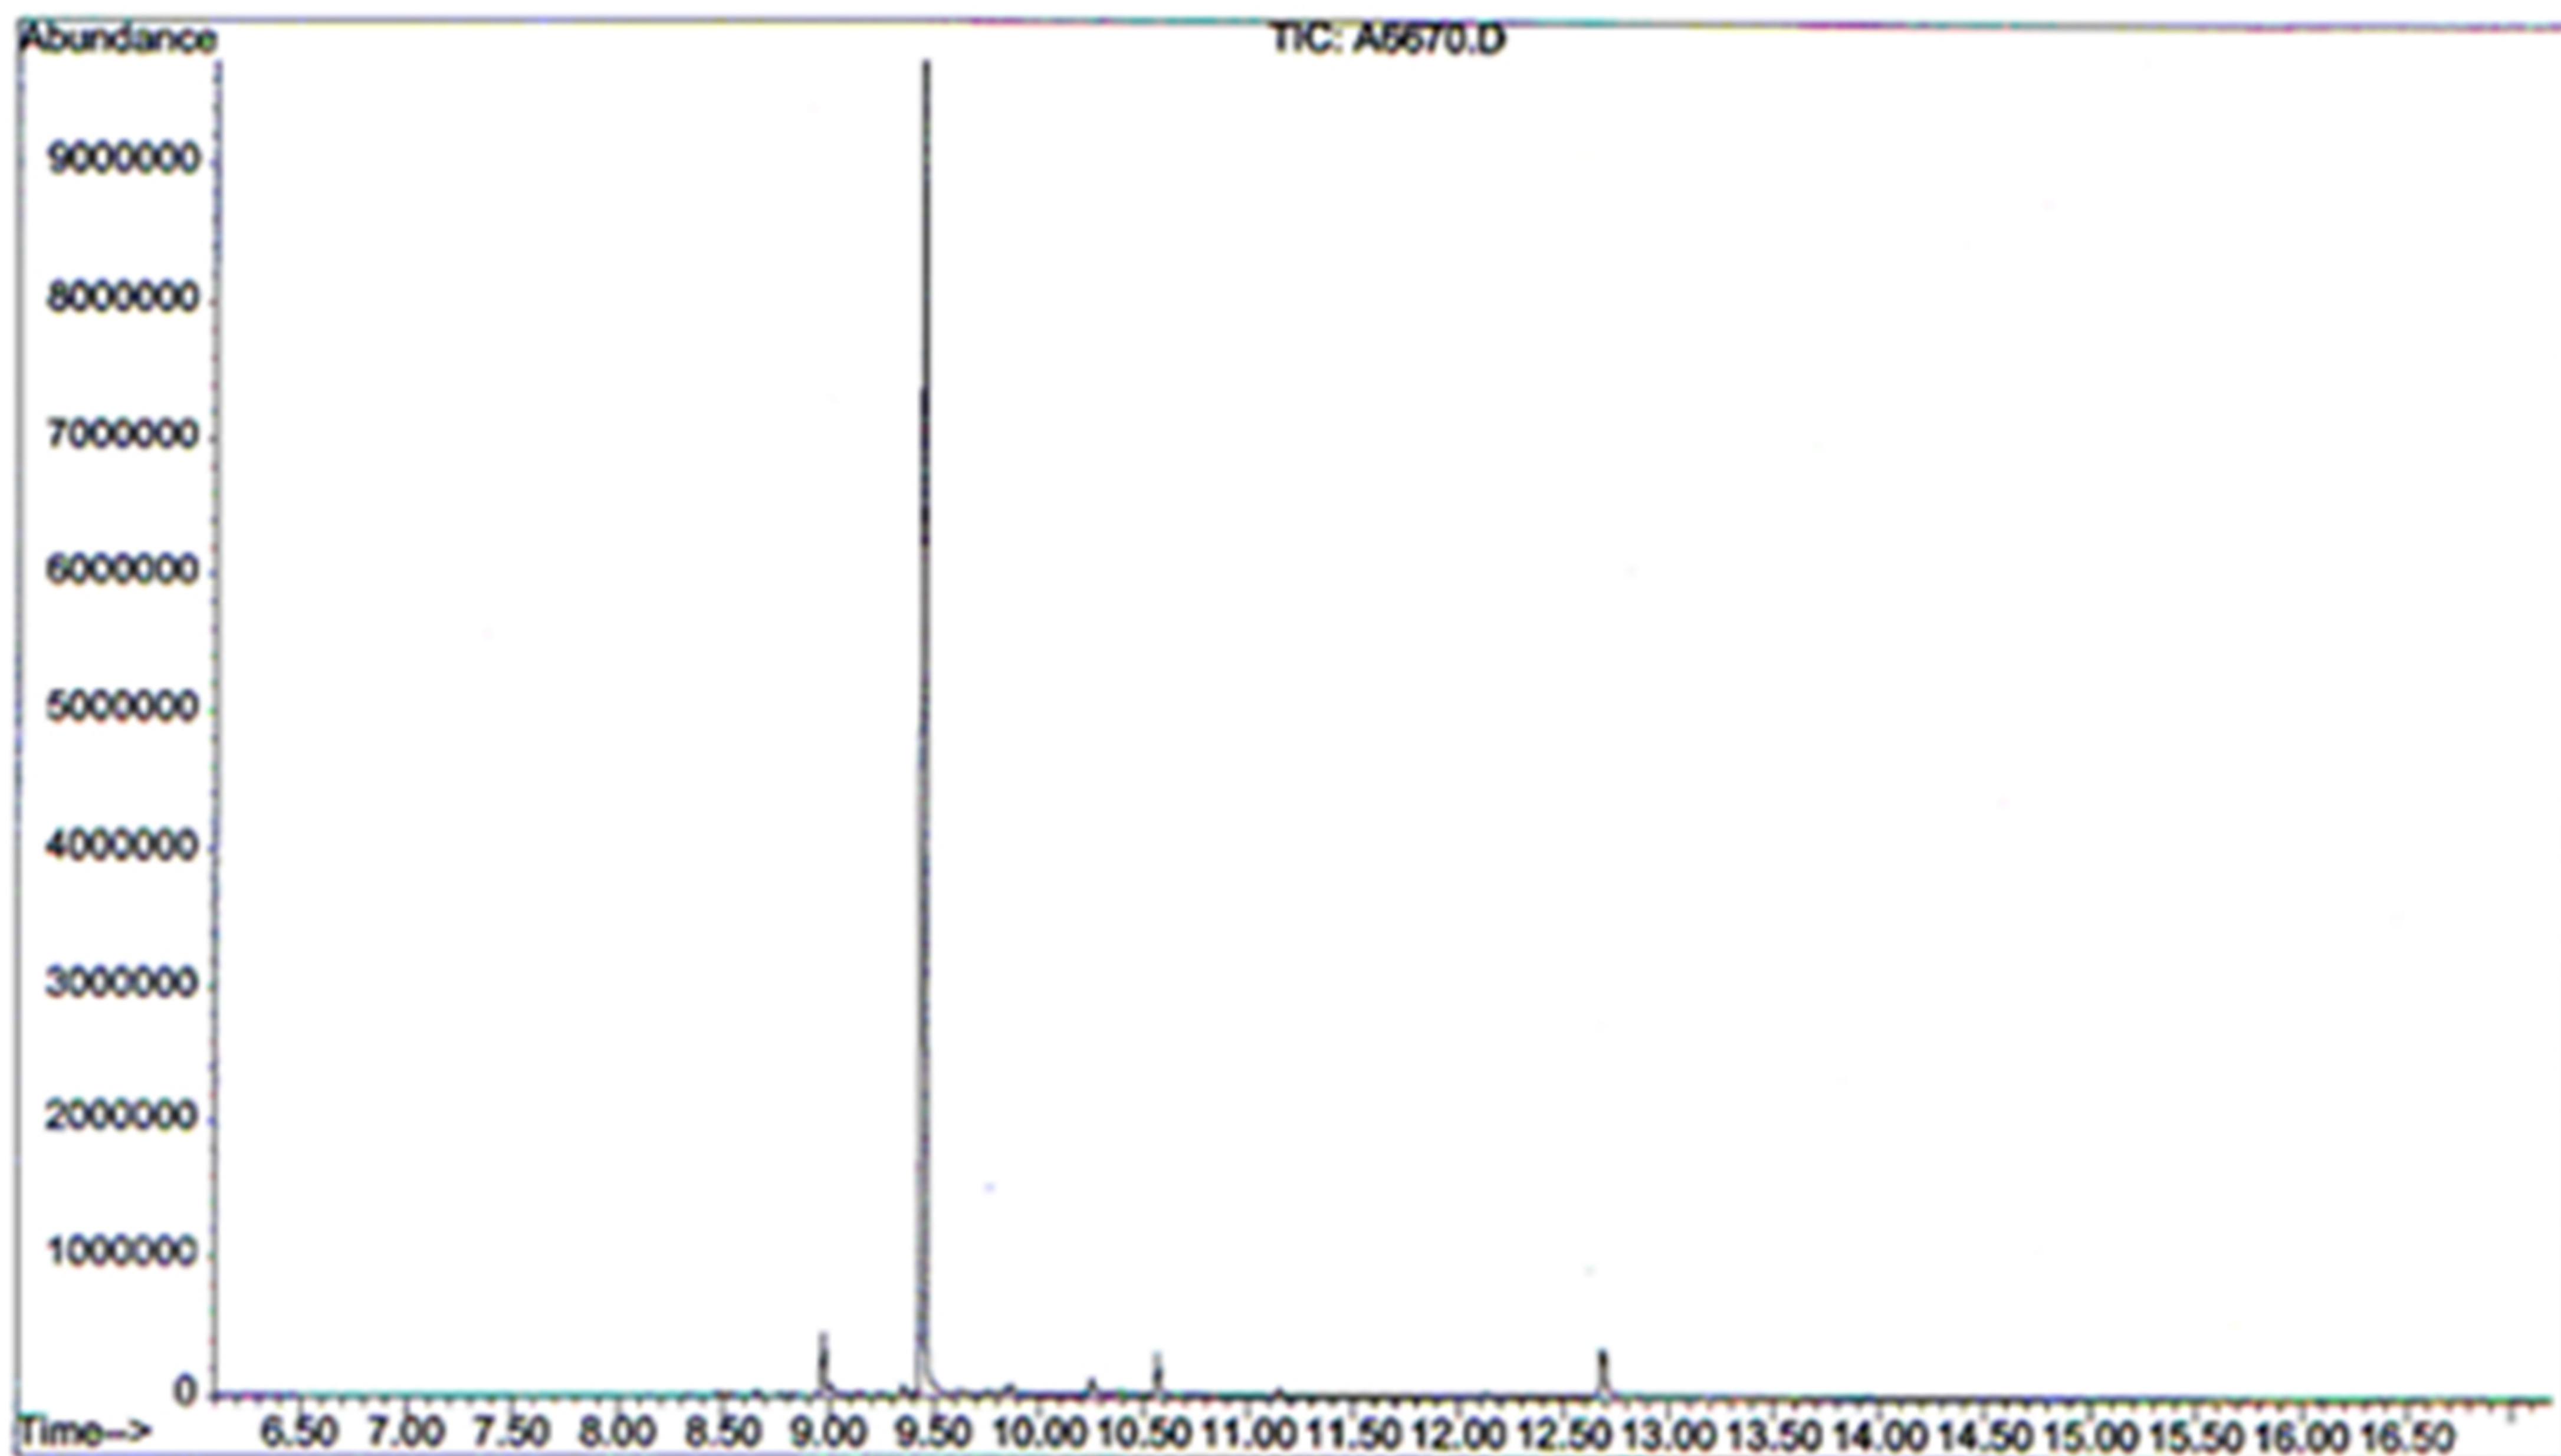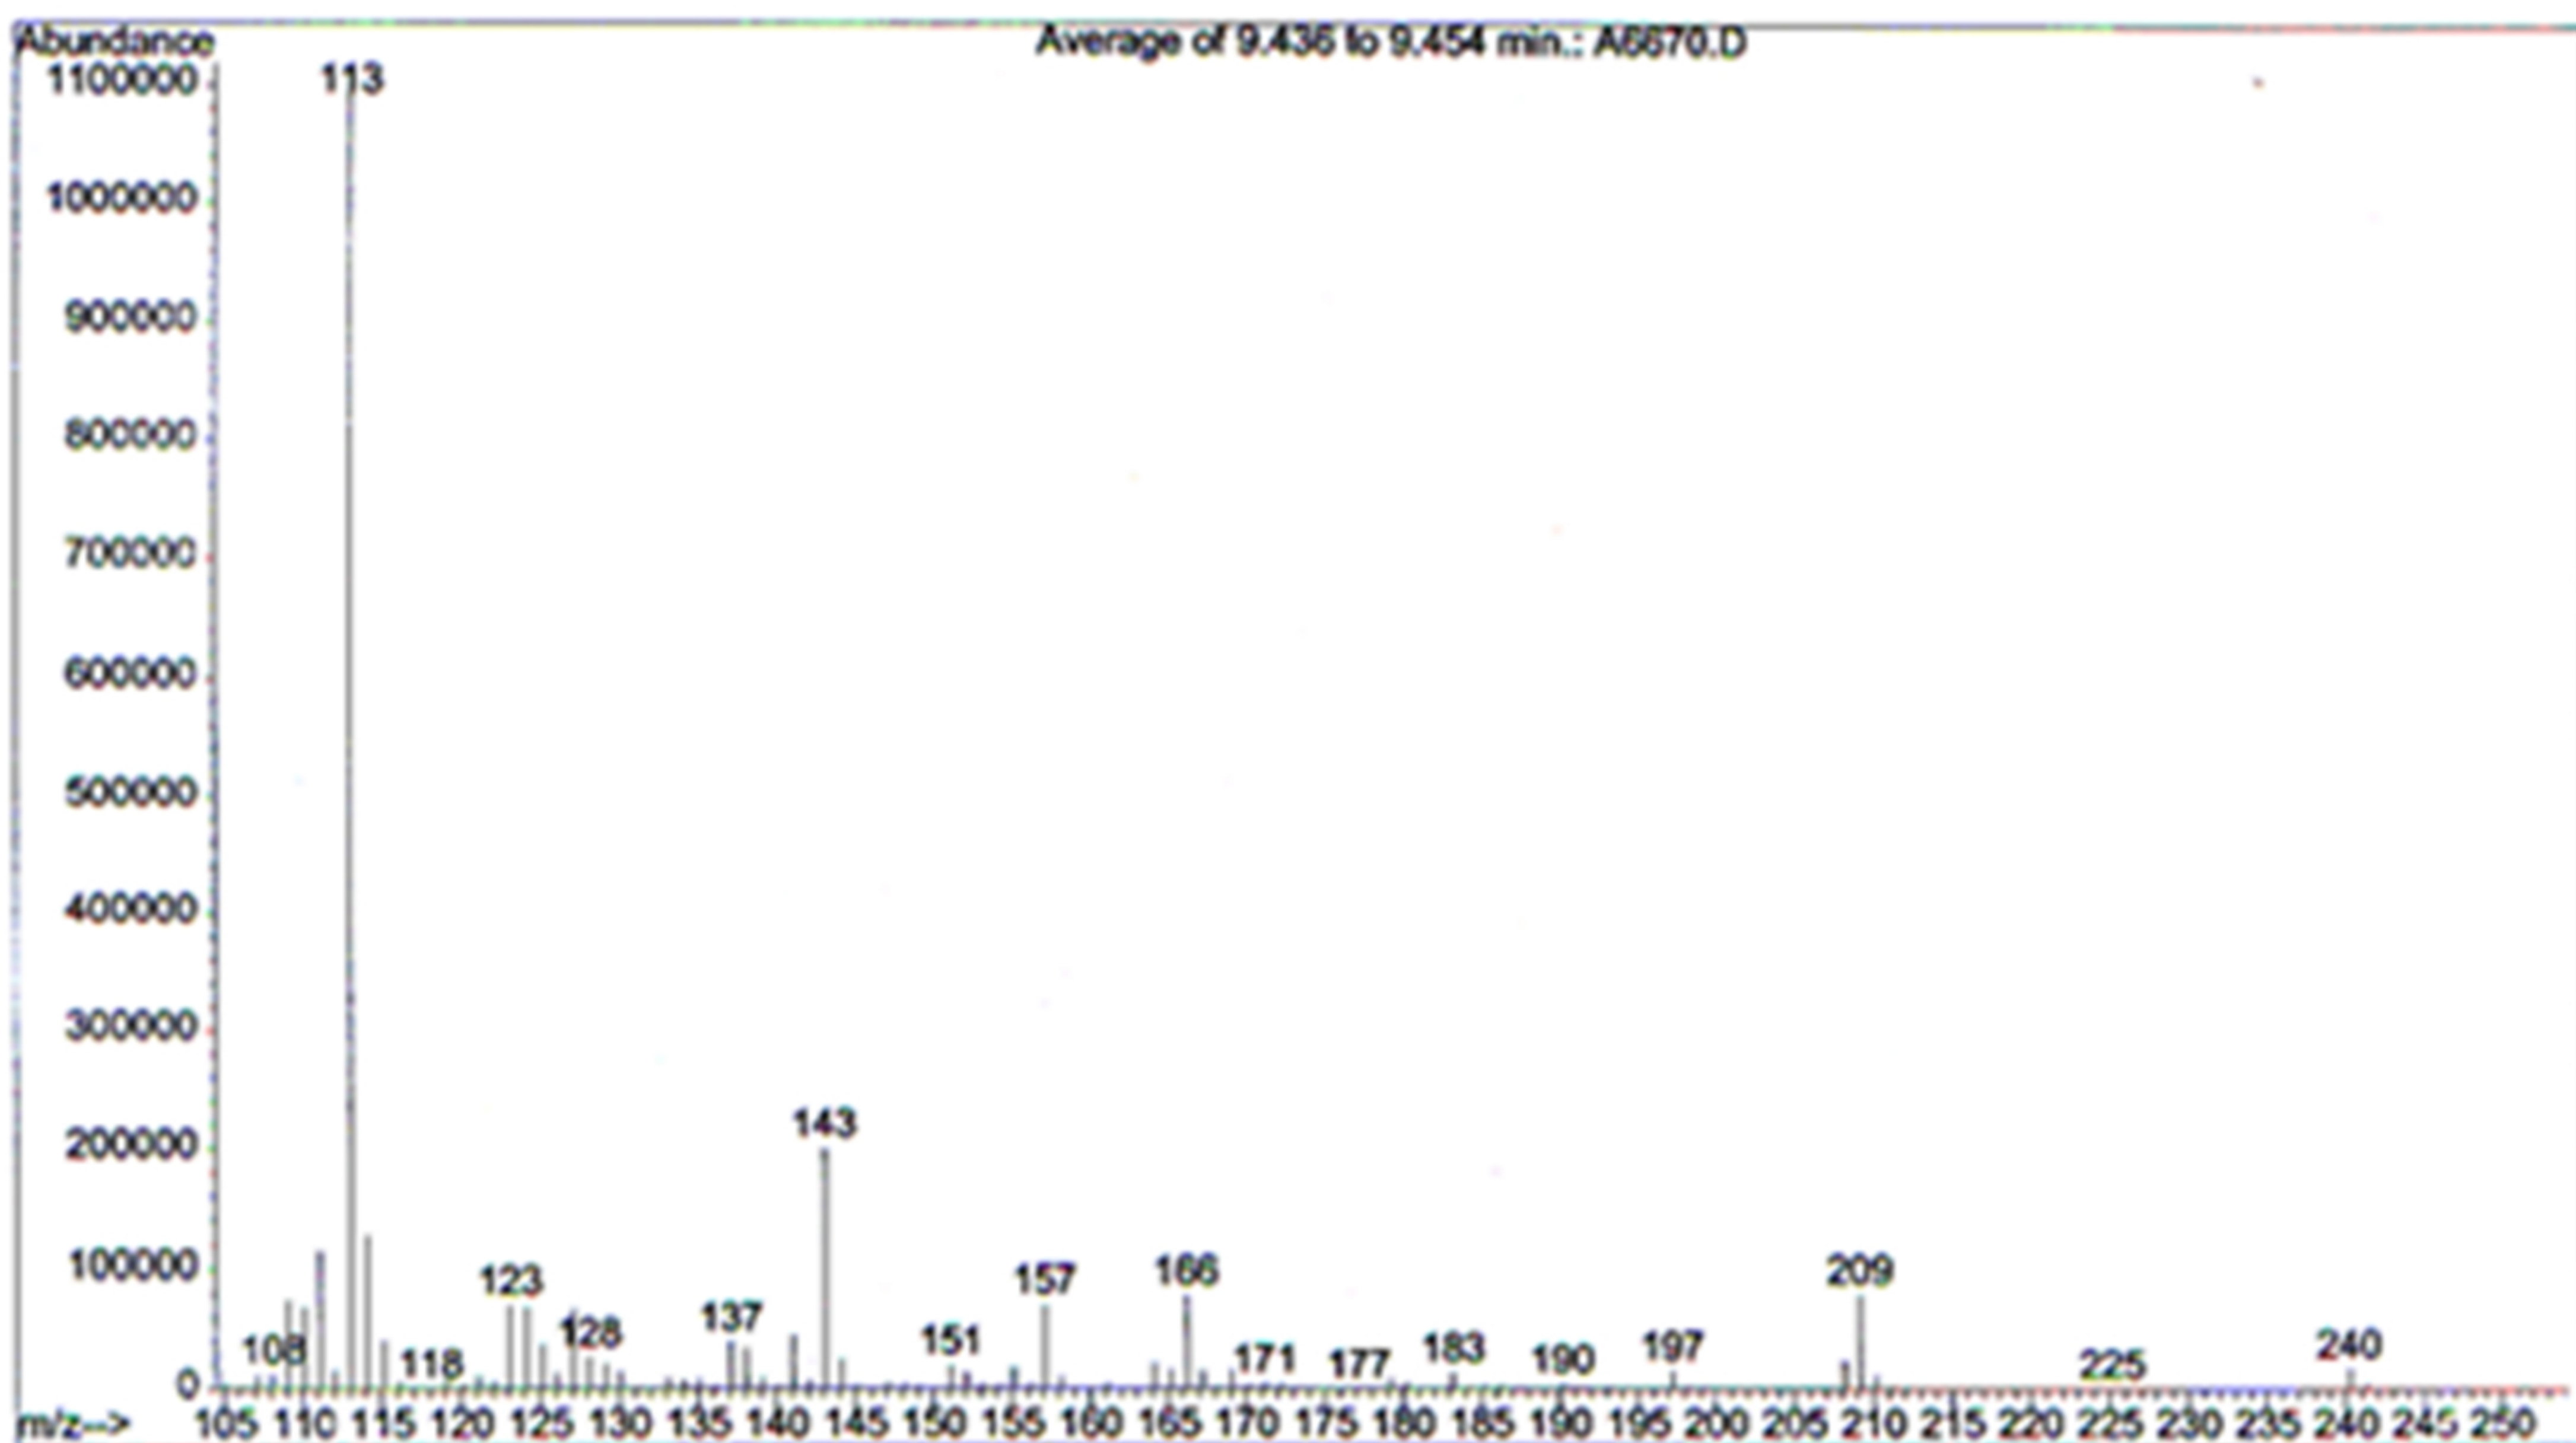

Supplement: mbo006121410sf06.pdf [file mbo006121410sf06.pdf]
